# Supplementary material
Source: MDPI journal article supplement (https://www.mdpi.com/2410-3888/8/4/209)
Supplement: s1 [file s1]

Table S1 Mean total values for depth (Dep, m), sea surface temperature (SST, °C), sea surface salinity (SSS), sea surface chlorophyll a (SSChl, mg/m<sup>3</sup>) sampled from three cruises in Yangtze Estuary (±95% confidence interval)

| Cruise timing | Depth        | SST          | SSS         | SSChl       |
|---------------|--------------|--------------|-------------|-------------|
| May 2019      | 5.14 ± 1.10  | 21.93 ± 0.22 | 7.47 ± 2.28 | 0.88 ± 0.14 |
| May 2020      | 7.05 ± 1.11  | 22.35 ± 0.23 | 7.38 ± 1.91 | 1.16 ± 0.15 |
| May 2021      | 10.25 ± 1.06 | 22.40 ± 0.28 | 4.32 ± 1.73 | 0.75 ± 0.06 |

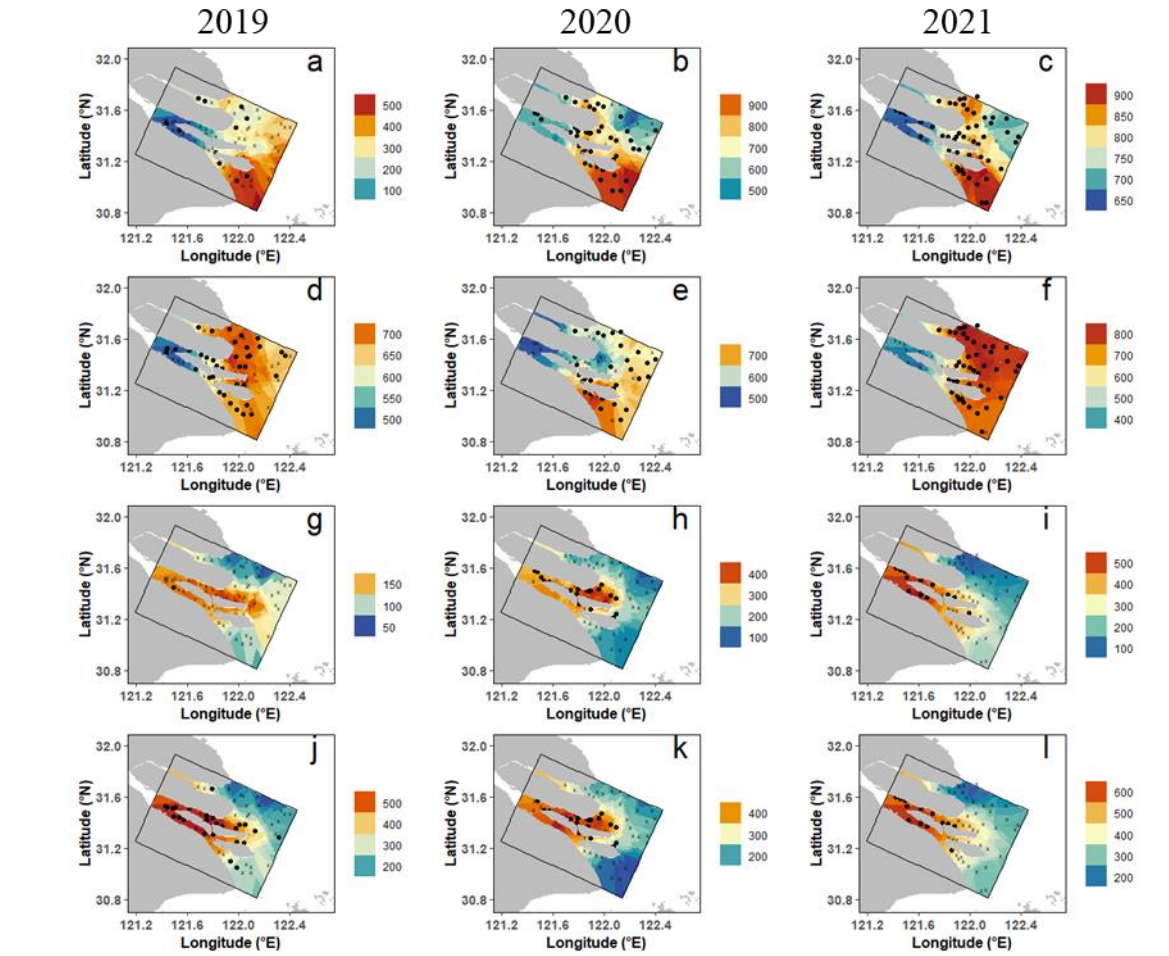

Figure S1 The distribution of modeled and observed for the four model species in all three cruises in the Yangtze Estuary. (a-c, *C. mystus*; d-f, *E. japonicas*; g-i, *P. sinensis*; j-l, *H. bleekeri*)

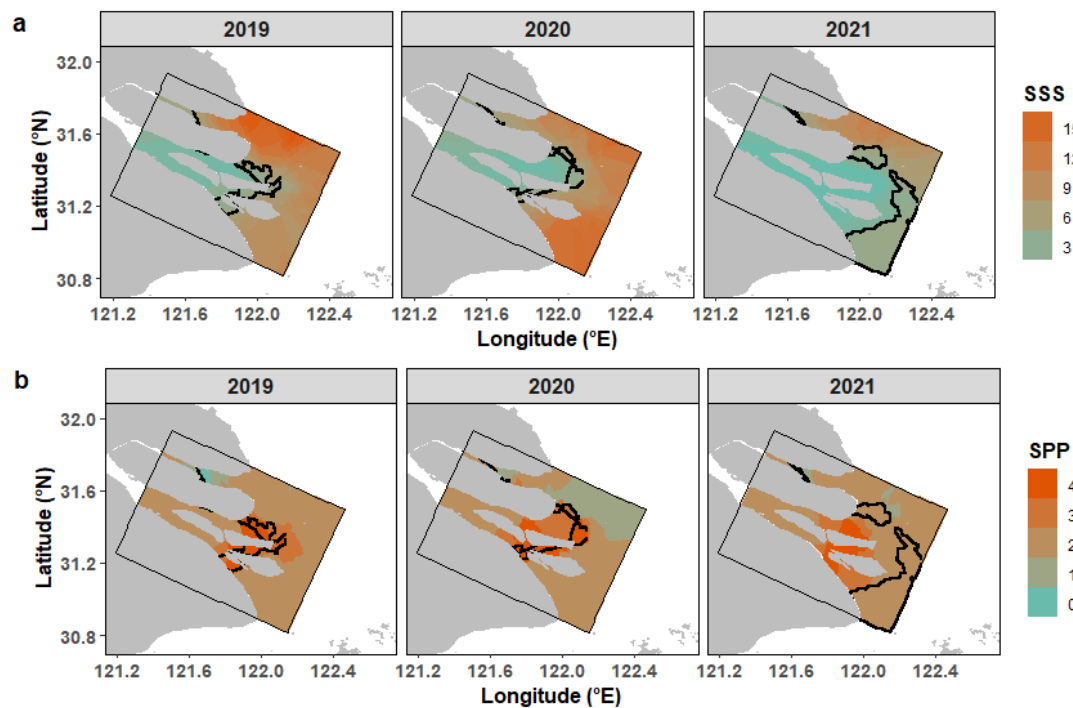

Figure S2 The spatial patterns of SSS (a) and the sum of predicted presences of the four species (b) considered in all three cruises in the Yangtze Estuary.
